# Supplementary material for: The exposed hematite surface and the generation of environmentally persistent free radicals during catechol degradation
Source: Royal Society of Chemistry journal article supplement (doi:10.1039/d0em00416b), 2020-11-16
Supplement: d0em00416b1.pdf [file d0em00416b1.pdf]

## Supporting information

### **The exposed hematite surface and the generation of environmentally persistent free radicals during catechol degradation**

Ziyu Zhao<sup>a</sup>, Quan Chen<sup>a</sup>, Hao Li<sup>a</sup>, Di Lang<sup>a</sup>, Meixuan Wu<sup>a</sup>, Dandan Zhou<sup>a</sup>, Bo Pan<sup>a,\*</sup>,  
Baoshan Xing<sup>b</sup>

<sup>a</sup> Yunnan Provincial Key Laboratory of Soil Carbon Sequestration and Pollution Control,  
Faculty of Environmental Science & Engineering, Kunming University of Science &  
Technology, Kunming, 650500, Yunnan, China

<sup>b</sup> Stockbridge School of Agriculture, University of Massachusetts, Amherst, MA 01003,  
United States

---

\*Corresponding author: Faculty of Environmental Science & Engineering, Kunming  
University of Science & Technology, Kunming, China, 650500  
E-mail address: panbocai@gmail.com (Bo Pan), Phone/Fax: 86-871-65170906

**Table S1** The surface areas and porous structures of particles

| Type of particles   | N <sub>2</sub> -BET<br>(m <sup>2</sup> /g) | Total pore volume<br>(cm <sup>3</sup> /g) | Average pore diameter<br>(nm) |
|---------------------|--------------------------------------------|-------------------------------------------|-------------------------------|
| Pure nano hematite  | 126                                        | 0.42                                      | 10.92                         |
| Pure micro hematite | 5                                          | 0.01                                      | 9.93                          |
| Pure silica         | 341                                        | 0.89                                      | 7.39                          |
| NanoHMT-silica      | 363                                        | 0.87                                      | 6.58                          |
| MicronHMT-silica    | 347                                        | 0.86                                      | 7.08                          |

**Table S2** Surface elemental analysis of the investigated particles using XPS

|                 | Sample   | C    | N    | O     | Si    | Fe   | Fe(II) | Fe(III) | Fe(II)% | Fe(III)% |
|-----------------|----------|------|------|-------|-------|------|--------|---------|---------|----------|
| Before reaction | Silica   | 3.00 | 0.34 | 68.93 | 27.73 | -    | -      | -       | -       | -        |
|                 | NanoHMT  | 6.40 | 0.69 | 64.17 | 19.94 | 8.80 | -      | 8.80    | -       | 100      |
|                 | MicroHMT | 3.41 | 0.00 | 68.14 | 26.23 | 2.22 | -      | 2.22    | -       | 100      |
| After reaction  | Silica   | 1.89 | 0.06 | 69.43 | 28.62 | -    | -      | -       | -       | -        |
|                 | NanoHMT  | 5.21 | 0.91 | 65.26 | 23.59 | 5.02 | 1.97   | 3.05    | 39.24   | 60.76    |
|                 | MicroHMT | 3.52 | 0.30 | 68.16 | 26.52 | 1.50 | 0.46   | 1.04    | 30.67   | 69.33    |

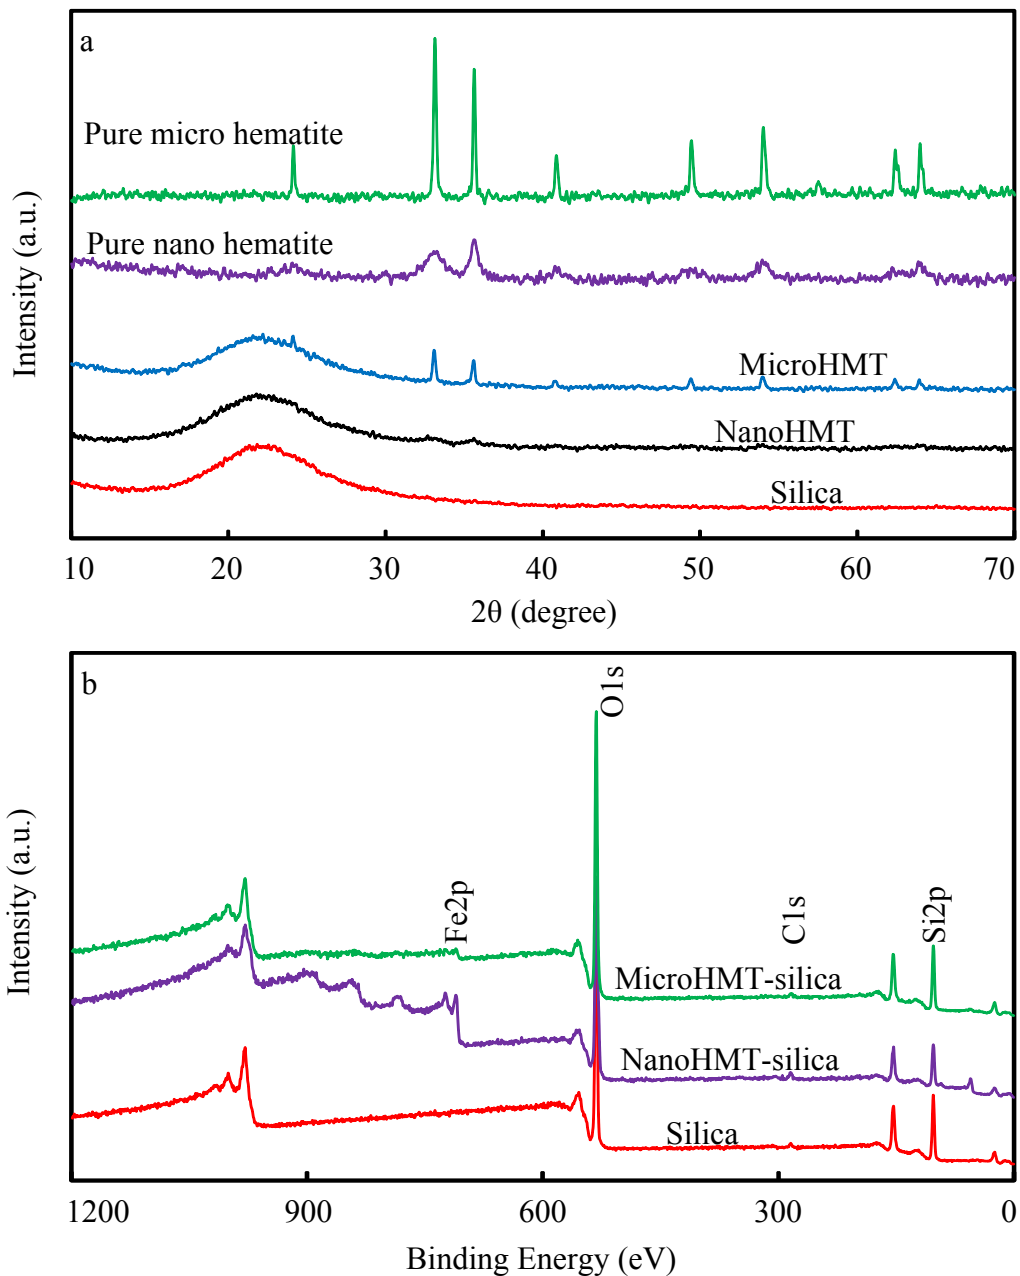

**Fig. S1** XRD patterns (a) and surface compositions (b) of silica, nanoHMT, microHMT as well as the pure nano and micro hematites. The surface elemental compositions were analyzed using X-ray photoelectron spectroscopy.

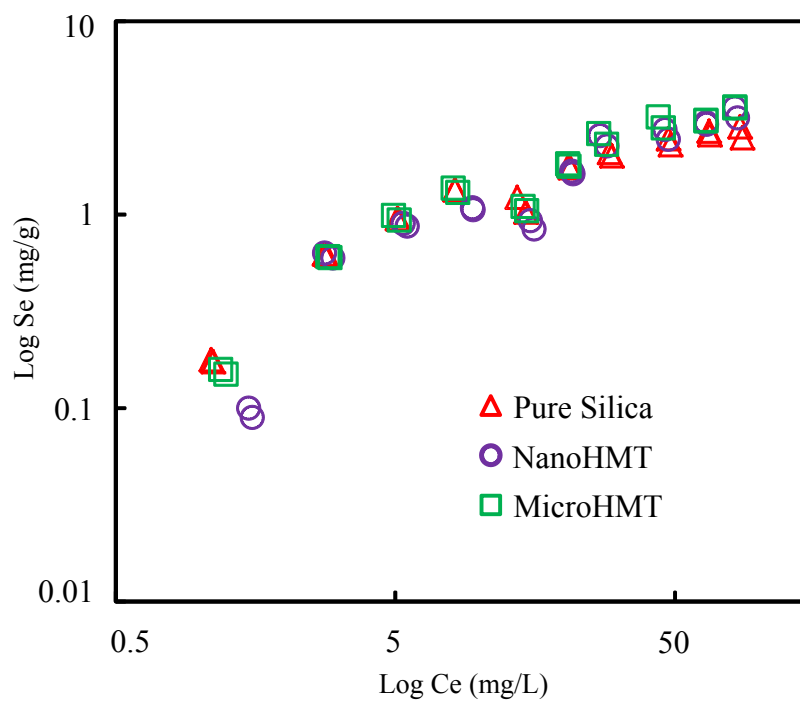

**Fig. S2** Adsorption isotherms of catechol on pure silica, nanoHMT, and microHMT.

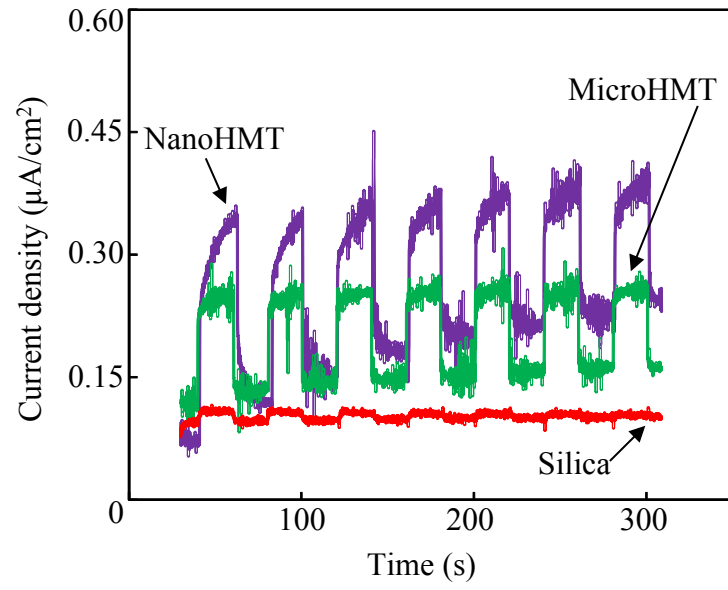

**Fig. S3** The photocurrent density of pure silica, nanoHMT and microHMT.

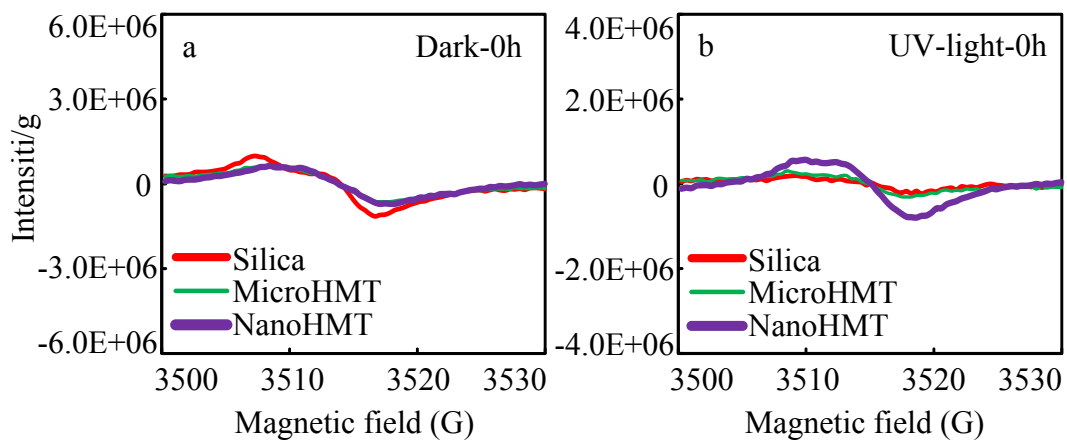

**Fig. S4** The EPR signals detected at beginning in the dark (a) and under continuous UV irradiation (b).

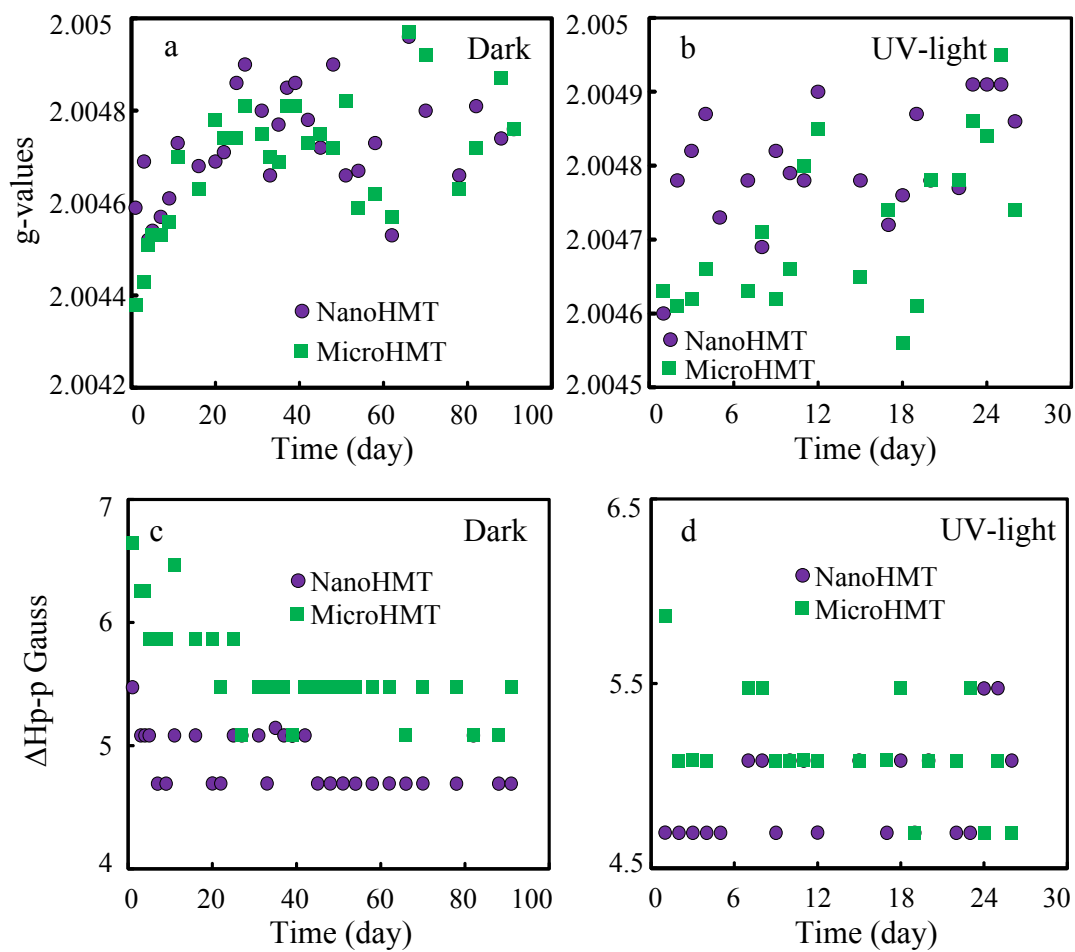

**Fig. S5** The g-values (a and b) and the  $\Delta H_{p-p}$  (c and d) of EPFRs variation with time in the dark and under UV irradiation at solid-phase catechol concentrations of  $0.60 \pm 0.09 \mu\text{g}/\text{mg}$ .



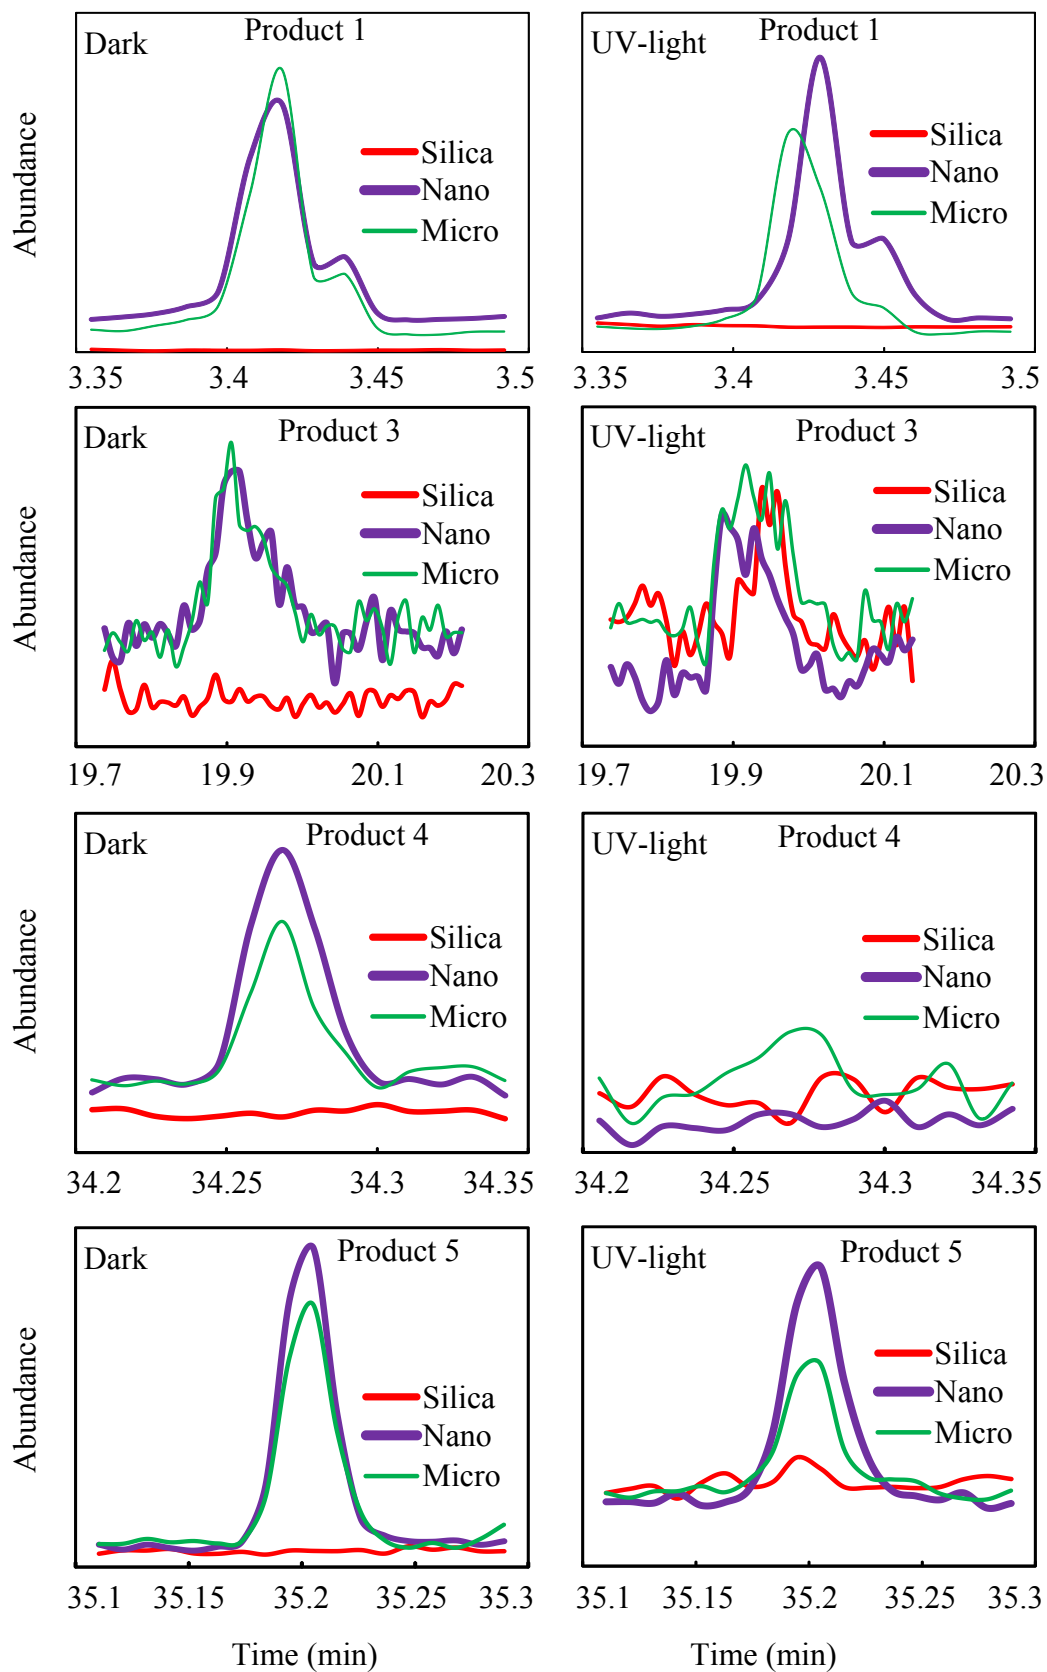

**Fig. S6** Comparison of the abundance of main degradation products of catechol in particles under dark and ultraviolet light conditions.

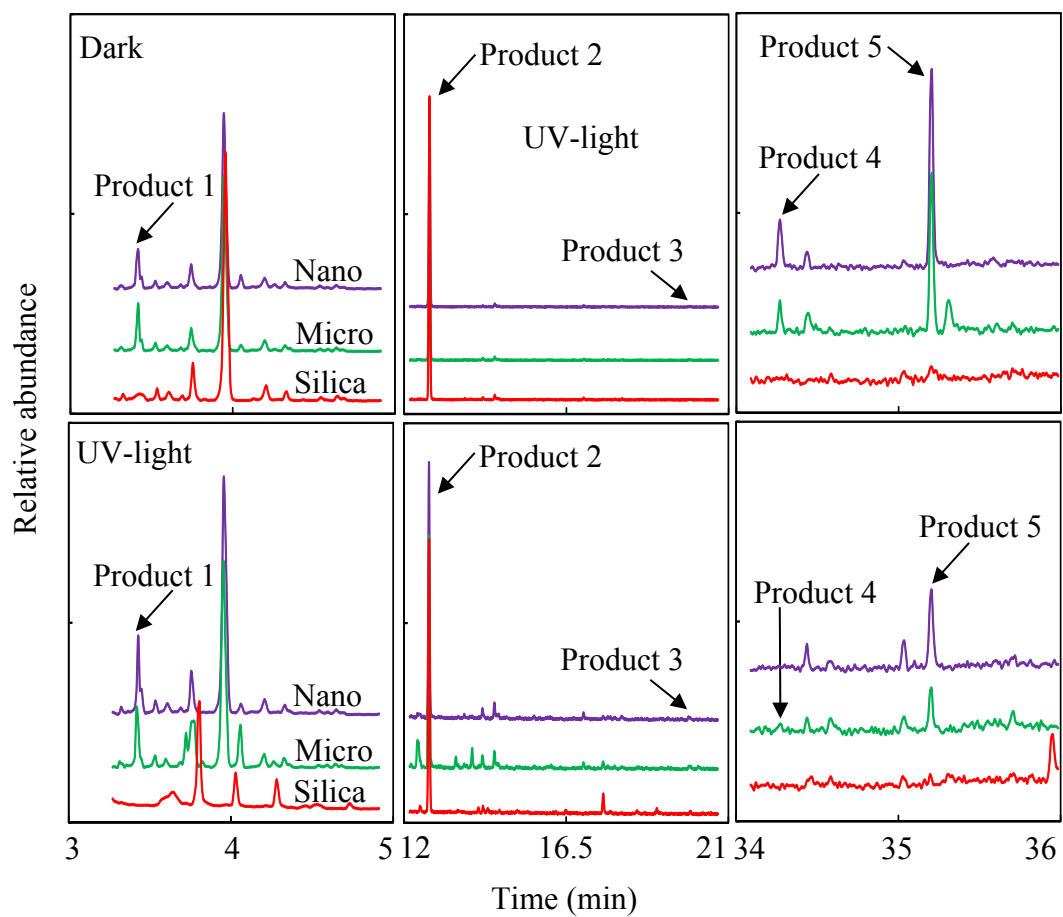

**Fig. S7** The GC chromatogram of the degradation products of catechol in particles under dark and ultraviolet light conditions.
